# Supplementary material for: All-Solid-State Proton-Based Tandem Structure Achieving Ultrafast Switching Electrochromic Windows
Source: Research Square preprint supplement (doi:10.21203/rs.3.rs-321790/v1), 2021-04-14
Supplement: Supplementary file 1 [file 57253dd5fcbe70571a7901c9.pdf]

# Supplementary Information for

## All-Solid-State Proton-Based Tandem Structure Achieving Ultrafast Switching Electrochromic Windows

Zewei Shao<sup>1,2,#</sup>, Aibin Huang<sup>1,2,#</sup>, Chen Ming<sup>1,2,#</sup>, John Bell<sup>3</sup>, Pu Yu<sup>4</sup>, Yi-Yang Sun<sup>1,2,\*</sup>,  
Liangmao Jin<sup>5</sup>, Liyun Ma<sup>5</sup>, Hongjie Luo<sup>6,\*</sup>, Ping Jin<sup>1,2,7</sup> and Xun Cao<sup>1,2,\*</sup>

<sup>1</sup>State Key Laboratory of High Performance Ceramics and Superfine Microstructure,  
Shanghai Institute of Ceramics, Chinese Academy of Sciences, Shanghai 201899,  
China

<sup>2</sup>University of Chinese Academy of Sciences, Beijing 100049, China

<sup>3</sup>Chemistry, Physics and Mechanical Engineering Science and Engineering Faculty,  
Queensland University of Technology, Brisbane, Queensland 4001, Australia

<sup>4</sup>State Key Laboratory of Low Dimensional Quantum Physics and Department of  
Physics, Tsinghua University, Beijing 100084, China.

<sup>5</sup>State Key Laboratory of Advanced Technology for Float Glass, Bengbu, Anhui  
233000, China

<sup>6</sup>School of Materials Science and Engineering, Shanghai University, Shanghai  
200444, China

<sup>7</sup>Materials Research Institute for Sustainable Development, National Institute of  
Advanced Industrial Science and Technology, Nagoya 463-8560, Japan

**Table S1.** Optical modulation, coloration time, bleaching time, and coloration efficiency of various reported ECDs using PEDOT or PEDOT:PSS. In these studies, instead of a proton source, PEDOT:PSS serves as an electrode or an electrochromic layer only. The EC performances of these works are also listed.

| Materials                  | Function   | T <sub>c</sub><br>(s) | T <sub>b</sub><br>(s) | ΔT<br>(%) | CE<br>(cm <sup>2</sup> /C) | Ref. |
|----------------------------|------------|-----------------------|-----------------------|-----------|----------------------------|------|
| PEDOT                      | EC layer   | ~                     | ~                     | 54%       | 183                        | 1    |
| PEDOT                      | EC layer   | ~                     | ~                     | 71%       | 193                        | 2    |
| PEDOT/graphene/Ag NW       | EC layer   | 4.1                   | 3.4                   | ~         | ~                          | 3    |
| WO <sub>3</sub> -PEDOT:PSS | EC layer   | 2.4                   | 0.8                   | 85.7%     | 68.8                       | 4    |
| PEDOT:PSS                  | Electrodes | ~                     | ~                     | ~         | ~                          | 5    |
| grid/PEDOT:PSS             | Electrodes | 12.7                  | 15.8                  | 70%       | 108.9                      | 6    |

#### References:

1. C. L. Gaupp *et al.*, Composite Coloration Efficiency Measurements of Electrochromic Polymers Based on 3, 4-Alkylendioxythiophenes. *Chemistry of Materials*, **14**, 3964-3970 (2002).
2. E. Poverenov *et al.*, Major Effect of Electropolymerization Solvent on Morphology and Electrochromic Properties of PEDOT Films. *Chemistry of Materials*, **22**, 4019-4025 (2010).
3. B. Deng *et al.*, Roll-To-Roll Encapsulation of Metal Nanowires between Graphene and Plastic Substrate for High-Performance Flexible Transparent Electrodes. *Nano Letters*, **15**, 4206-4213 (2015).
4. G. Cai *et al.*, Direct Inkjet-Patterning of Energy Efficient Flexible Electrochromics. *Nano Energy*, **49**, 147-154 (2018).
5. R. Singh, R *et al.*, ITO-Free Solution-Processed Flexible Electrochromic Devices Based on PEDOT: PSS As Transparent Conducting Electrode. *ACS Applied Materials & Interfaces*, **9**, 19427-19435 (2017).
6. G. Cai *et al.*, Inkjet Printed Large Area Multifunctional Smart Windows. *Advanced Energy Materials*, **7**, 1602598 (2017).

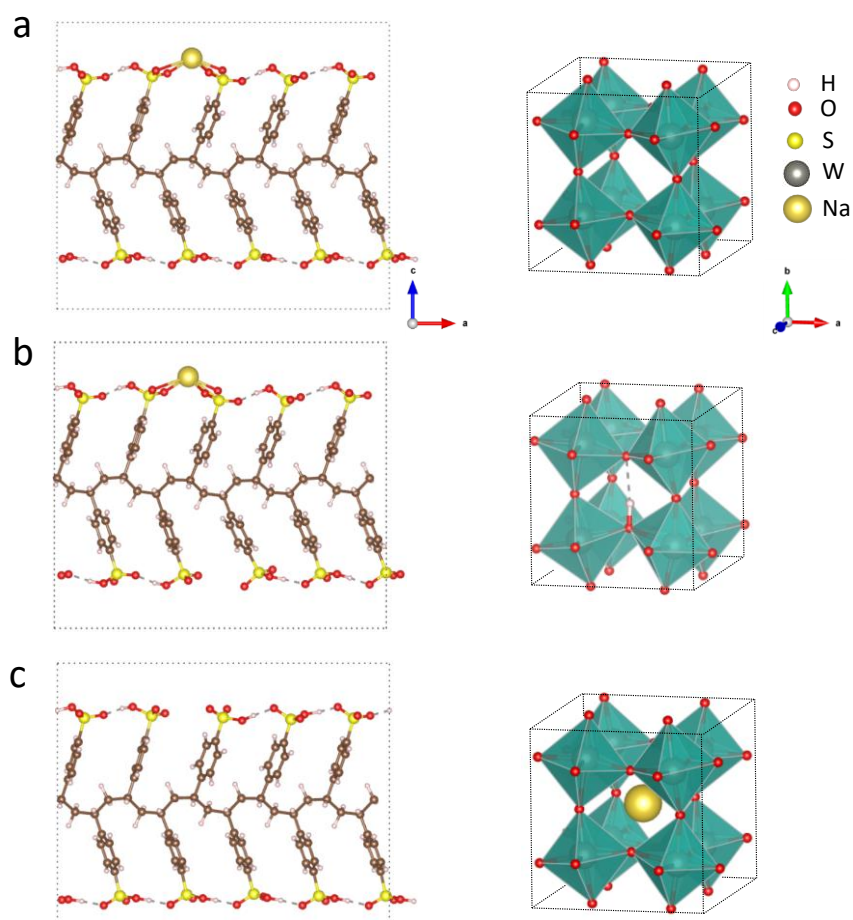

**Figure S1.** First-principles calculation of atomic structures and energy of proton and Na ions in PSS and  $\text{WO}_3$ . (a) The proton and Na ions were both adsorbed on PSS leaving a pristine  $\text{WO}_3$ . (b) One proton was transferred from PSS to  $\text{WO}_3$ . (c) The Na ion was transferred from PSS to  $\text{WO}_3$ . The crystalline  $\text{WO}_3$  with a monoclinic structure (ICSD#80057) was used to model the amorphous  $\text{WO}_3$  which contains 48 atoms. A single PSS chain with five repeating unit was used to model the structure of PSS. Periodical boundary conditions were applied on all the structures.

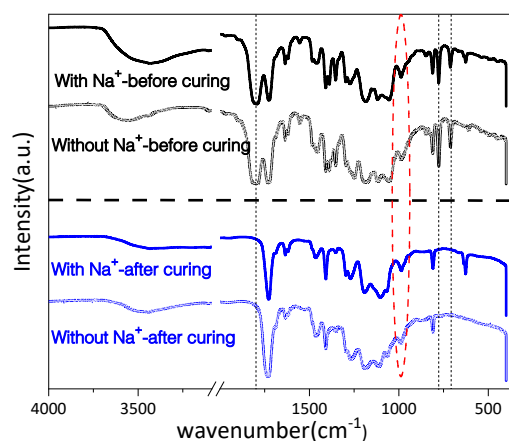

**Figure S2.** FT-IR spectra of the solid polymer electrolyte. The four curves present four samples with/without  $\text{Na}^+$  before/after UV curing. Dotted vertical lines indicate the disappearing peaks after curing. Red dashed circle highlights the slight shift of the peak to the right after inserting  $\text{Na}^+$  ions. The red heart indicates a new peak appeared after the inserting the  $\text{Na}^+$  ions. The typical stretching and bending peaks of  $\text{CH}_2$  at  $1460\text{ cm}^{-1}$  and also the stretching peak of the carbonyl group at  $1740\text{ cm}^{-1}$  show no obvious change before and after curing. The disappeared peak at  $1801\text{ cm}^{-1}$  could be attributed to solvent evaporation.

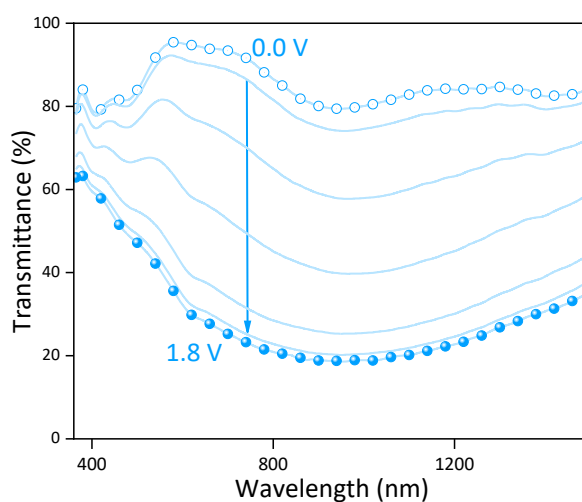

**Figure S3.** Transmittance spectra of SPE- $\text{WO}_3$  device at voltages from 0 to 1.8 V with a separation of 0.3 V.

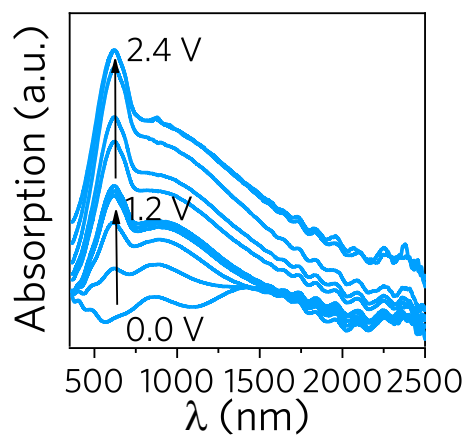

**Figure S4.** Absorption spectra of SPE/PEDOT:PSS/WO<sub>3</sub> tandem structure device from 0 V to 2.4 V. The absorption peaks are mainly located at 620 and 860 nm consistent with the transmittance measurements.

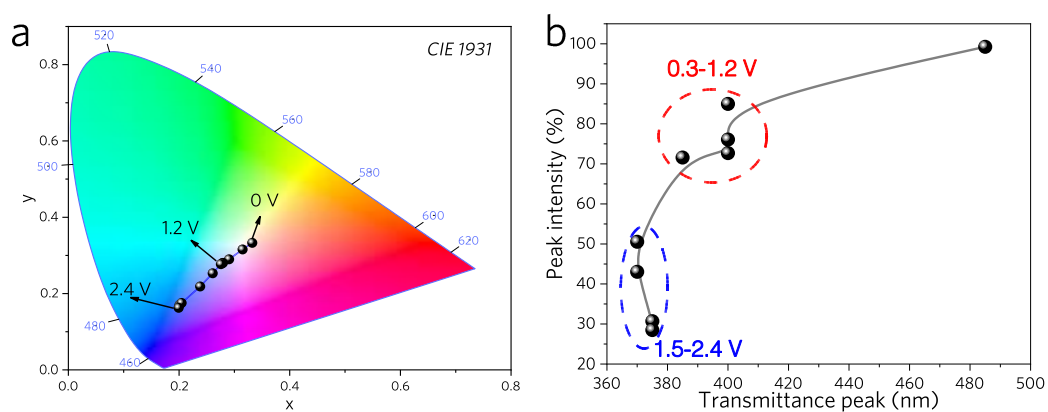

**Figure S5.** Color changes in the coloration process. (a) peak\*x\*y\* color space (CIE 1931) results of all-solid-state device under different applied potentials (0.0 V to 2.4 V). (b) Peak positions of all-solid-state device under different applied potentials. The EC device absorbs mainly blue light, exhibiting a flatter transmittance in the visible light region. Besides, the coloration process also experiences a two-step change. The coloration peak changes from 400 to 380 nm, which is consistent with the transmittance spectrum.

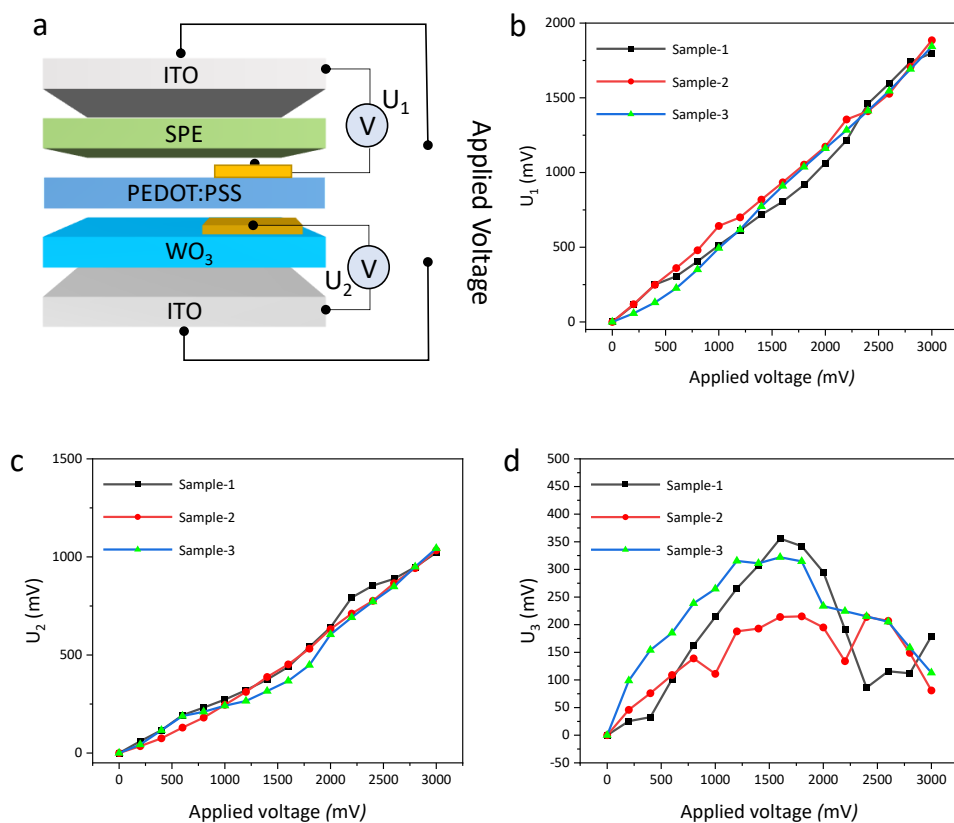

**Figure S6.** Voltage drops at individual layers on three different samples. (a) Schematic diagram of measurements of the voltage drops. (b) and (c) show the voltage drops on the SPE ( $U_1$ ) and WO<sub>3</sub> ( $U_2$ ) layers, which are measured directly, and (d) shows the voltage drop on the PEDOT:PSS layer ( $U_3$ ), which is obtained by taking the difference between the applied voltage and the sum of  $U_1$  and  $U_2$ .

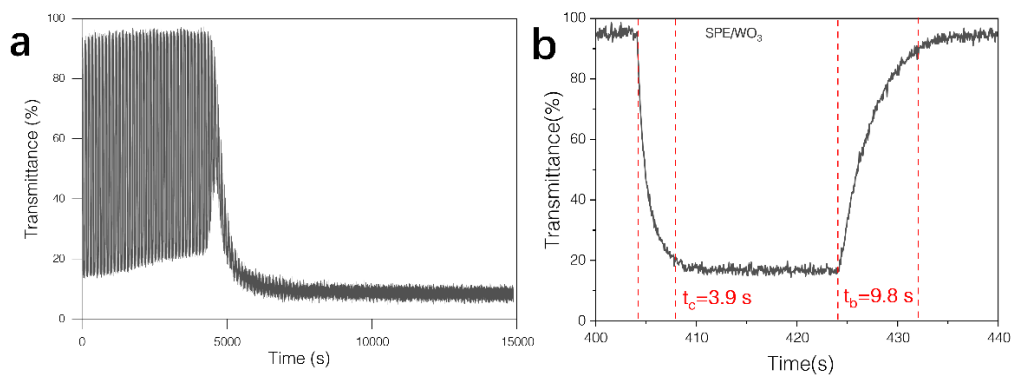

**Figure S7.** Cycle performance and switching speed of the SPE/WO<sub>3</sub> device without the PEDOT:PSS layer. (a) Real-time transmittance spectra at 670 nm in the  $-0.5$  to  $1.5$  V window; (b) Switching time measurement. The coloration and bleaching time (switching over 90% of the dynamic range) is about 3.9 and 9.8 seconds. The device degraded quickly after 100 cycles.

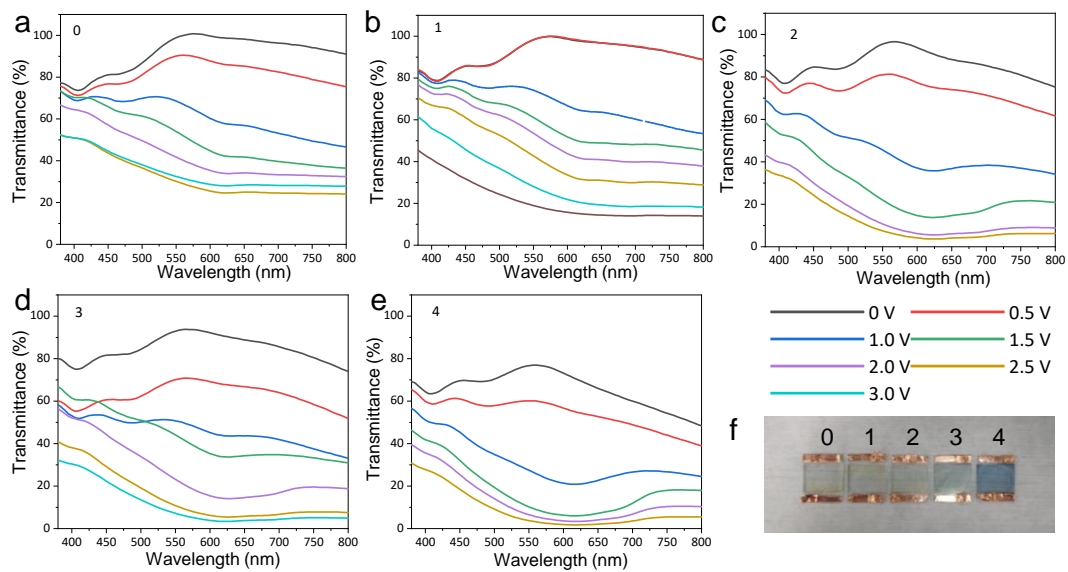

**Figure S8.** Transmittance spectra and photos of the devices with different thickness of PEDOT:PSS at applied voltages from 0 V to 3 V. The thickness was controlled by the times of spin coating of PEDOT:PSS (a) without PEDOT:PSS, (b)-(e) 1-4 times of spin coating. (f) Photographs of the devices.

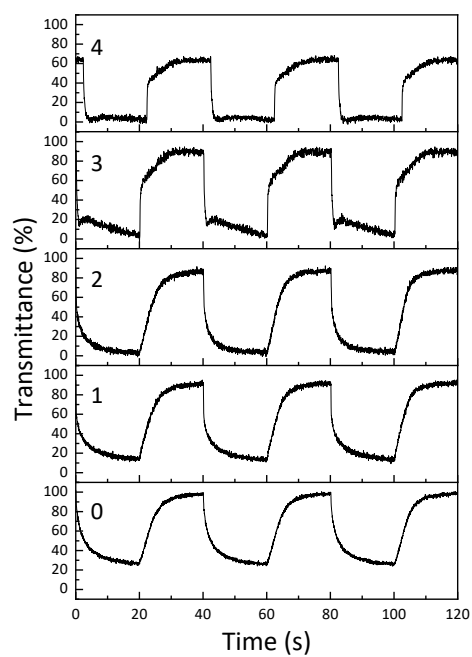

**Figure S9.** Dependence of switching speed on the thickness of PEDOT:PSS layer. 0-4 corresponds to the devices shown in Figure S4.

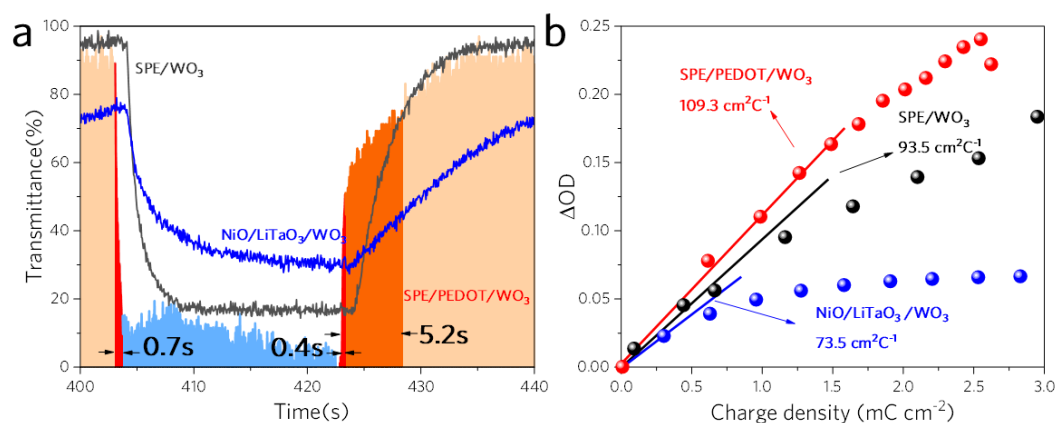

**Figure S11.** Performance comparison of ECDs with SPE/WO<sub>3</sub>, NiO/LiTaO<sub>3</sub>/WO<sub>3</sub> and the newly designed SPE/PEDOT/WO<sub>3</sub> structures. (a) Switching times from the transmittance spectra. (b) Changes in optical density ( $\Delta OD$ ) at 670 nm with respect to injected charge density. The calculated CEs are 109 cm<sup>2</sup> C<sup>-1</sup> at 670 nm compared to the 73.5 cm<sup>2</sup> C<sup>-1</sup> using traditional LiTaO<sub>3</sub> electrolyte and 93.5 cm<sup>2</sup> C<sup>-1</sup> using SPE/WO<sub>3</sub>.

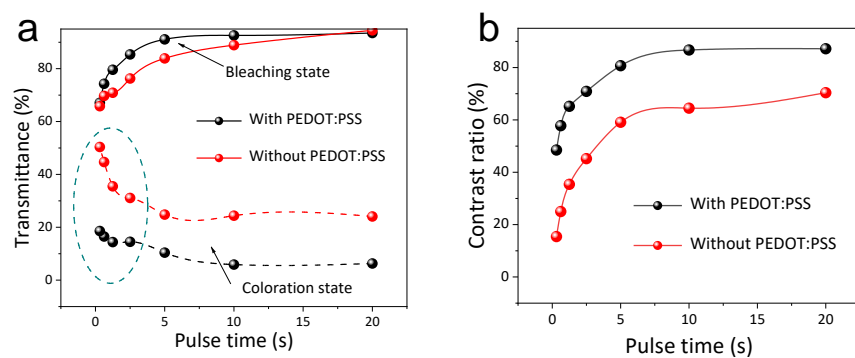

**Figure S12.** (a) Transmittance vs. voltage pulse width of the devices with and without PEDOT:PSS layer in the coloration and bleaching states. (b) Contrast ratio of the devices under different pulse width.

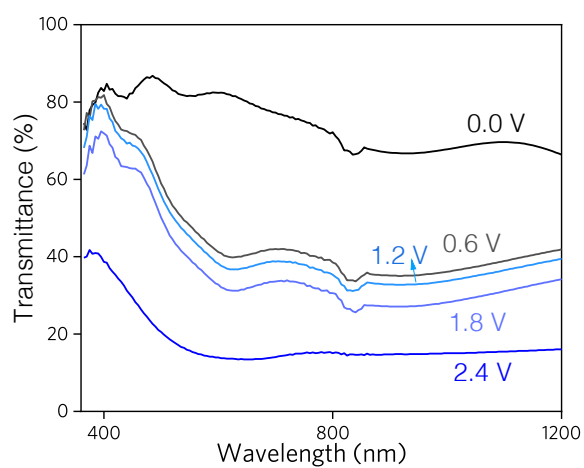

**Figure S13.** Transmittance spectra of the  $10 \times 10 \text{ cm}^2$  EC device using the tandem structure.

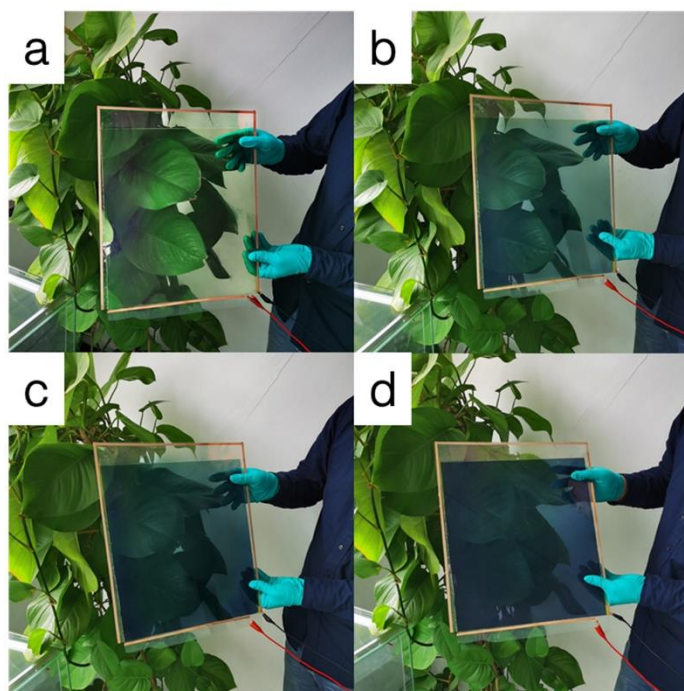

**Figure S14.** Photographs of the  $30 \times 40 \text{ cm}^2$  EC device using the tandem structure under (a) 0, (b) 2.0, (c) 4.0, and (d) 6.0 V.
